# Supplementary material for: Ensemble Machine Learning Outperforms Empirical Equations for the Ground Heat Flux Estimation with Remote Sensing Data
Source: Preprints.org preprint supplement (doi:10.20944/preprints202202.0199.v1), 2022-02-17
Supplement: Supplementary file 3 [file supplementary]

## Sheet: Sheet1
TABLE SP1: Error values parametritzation hypervalues RF models				Error values parametritzation hypervalues NN models
mtry	ntree	RMSE	type	size	decay	RMSE	type
1	50	46.0327	rf I	10	0.001	46.7221	NN I
1	100	45.9597	rf I	10	0.051	46.6831	NN I
1	200	45.9026	rf I	10	0.101	46.874	NN I
1	400	45.9091	rf I	10	0.151	46.7069	NN I
1	800	45.8874	rf I	15	0.001	46.9458	NN I
2	50	46.0105	rf I	15	0.051	46.1943	NN I
2	100	45.9254	rf I	15	0.101	46.5485	NN I
2	200	45.904	rf I	15	0.151	46.3643	NN I
2	400	45.8744	rf I	20	0.001	46.1066	NN I
2	800	45.8873	rf I	20	0.051	46.1115	NN I
3	50	45.9712	rf I	20	0.101	46.2174	NN I
3	100	45.9619	rf I	20	0.151	46.1327	NN I
3	200	45.9213	rf I	10	0.001	39.9155	NN II
3	400	45.8953	rf I	10	0.051	39.502	NN II
3	800	45.8827	rf I	10	0.101	39.5222	NN II
4	50	46.0023	rf I	10	0.151	39.578	NN II
4	100	45.9241	rf I	15	0.001	39.4553	NN II
4	200	45.8942	rf I	15	0.051	39.334	NN II
4	400	45.8787	rf I	15	0.101	39.3662	NN II
4	800	45.8754	rf I	15	0.151	39.2927	NN II
5	50	45.9544	rf I	20	0.001	39.3449	NN II
5	100	45.9557	rf I	20	0.051	39.3361	NN II
5	200	45.889	rf I	20	0.101	39.371	NN II
5	400	45.894	rf I	20	0.151	39.2994	NN II
5	800	45.8865	rf I	10	0.001	37.9422	NN III
6	50	46.0054	rf I	10	0.051	37.8389	NN III
6	100	45.9591	rf I	10	0.101	37.5868	NN III
6	200	45.9245	rf I	10	0.151	37.4896	NN III
6	400	45.9009	rf I	15	0.001	37.8445	NN III
6	800	45.8859	rf I	15	0.051	37.6042	NN III
7	50	45.959	rf I	15	0.101	37.3351	NN III
7	100	45.9131	rf I	15	0.151	37.517	NN III
7	200	45.923	rf I	20	0.001	37.6068	NN III
7	400	45.8987	rf I	20	0.051	37.4533	NN III
7	800	45.88	rf I	20	0.101	37.3809	NN III
8	50	46.0178	rf I	20	0.151	37.2709	NN III
8	100	45.9131	rf I
8	200	45.9331	rf I
8	400	45.8706	rf I
8	800	45.8926	rf I
9	50	46.0484	rf I
9	100	45.9184	rf I
9	200	45.9046	rf I
9	400	45.8886	rf I
9	800	45.8871	rf I
10	50	45.9664	rf I
10	100	45.9548	rf I
10	200	45.8892	rf I
10	400	45.8838	rf I
10	800	45.878	rf I
11	50	45.9929	rf I
11	100	45.9365	rf I
11	200	45.9288	rf I
11	400	45.8928	rf I
11	800	45.8791	rf I
12	50	45.9647	rf I
12	100	45.8871	rf I
12	200	45.88	rf I
12	400	45.8951	rf I
12	800	45.8873	rf I
13	50	46.0253	rf I
13	100	45.8606	rf I
13	200	45.9193	rf I
13	400	45.8826	rf I
13	800	45.8611	rf I
14	50	45.9626	rf I
14	100	45.9402	rf I
14	200	45.8831	rf I
14	400	45.8903	rf I
14	800	45.8803	rf I
15	50	45.9836	rf I
15	100	45.9068	rf I
15	200	45.8963	rf I
15	400	45.8925	rf I
15	800	45.8867	rf I
1	50	38.0837	rf II
1	100	38.0274	rf II
1	200	37.9412	rf II
1	400	37.8871	rf II
1	800	37.8957	rf II
2	50	39.9238	rf II
2	100	39.7869	rf II
2	200	39.699	rf II
2	400	39.7015	rf II
2	800	39.6661	rf II
3	50	39.8021	rf II
3	100	39.7855	rf II
3	200	39.7107	rf II
3	400	39.7178	rf II
3	800	39.6891	rf II
4	50	39.8609	rf II
4	100	39.7496	rf II
4	200	39.6602	rf II
4	400	39.6882	rf II
4	800	39.6602	rf II
5	50	39.8873	rf II
5	100	39.8091	rf II
5	200	39.7302	rf II
5	400	39.6714	rf II
5	800	39.671	rf II
6	50	39.9281	rf II
6	100	39.7387	rf II
6	200	39.7498	rf II
6	400	39.7087	rf II
6	800	39.6956	rf II
7	50	39.9872	rf II
7	100	39.7425	rf II
7	200	39.7652	rf II
7	400	39.7078	rf II
7	800	39.6737	rf II
8	50	39.8614	rf II
8	100	39.7944	rf II
8	200	39.7512	rf II
8	400	39.6975	rf II
8	800	39.6913	rf II
9	50	39.8406	rf II
9	100	39.7817	rf II
9	200	39.7185	rf II
9	400	39.6888	rf II
9	800	39.6788	rf II
10	50	39.9059	rf II
10	100	39.7969	rf II
10	200	39.6829	rf II
10	400	39.6926	rf II
10	800	39.6612	rf II
11	50	39.9267	rf II
11	100	39.7445	rf II
11	200	39.73	rf II
11	400	39.6716	rf II
11	800	39.67	rf II
12	50	39.8748	rf II
12	100	39.8623	rf II
12	200	39.7022	rf II
12	400	39.6972	rf II
12	800	39.6823	rf II
13	50	39.8767	rf II
13	100	39.813	rf II
13	200	39.6721	rf II
13	400	39.7203	rf II
13	800	39.6691	rf II
14	50	39.8865	rf II
14	100	39.7736	rf II
14	200	39.7121	rf II
14	400	39.6912	rf II
14	800	39.6823	rf II
15	50	39.8615	rf II
15	100	39.7785	rf II
15	200	39.7224	rf II
15	400	39.7143	rf II
15	800	39.6908	rf II
1	50	31.3598	rf III
1	100	31.2594	rf III
1	200	31.1561	rf III
1	400	31.1561	rf III
1	800	31.1124	rf III
2	50	31.4519	rf III
2	100	31.3004	rf III
2	200	31.2114	rf III
2	400	31.1819	rf III
2	800	31.1645	rf III
3	50	31.608	rf III
3	100	31.4354	rf III
3	200	31.3916	rf III
3	400	31.3481	rf III
3	800	31.3221	rf III
4	50	31.6281	rf III
4	100	31.4345	rf III
4	200	31.3845	rf III
4	400	31.348	rf III
4	800	31.3385	rf III
5	50	31.5937	rf III
5	100	31.3912	rf III
5	200	31.3542	rf III
5	400	31.3304	rf III
5	800	31.32	rf III
6	50	31.5227	rf III
6	100	31.4546	rf III
6	200	31.395	rf III
6	400	31.3226	rf III
6	800	31.3281	rf III
7	50	31.6687	rf III
7	100	31.3845	rf III
7	200	31.3744	rf III
7	400	31.3486	rf III
7	800	31.3062	rf III
8	50	31.5711	rf III
8	100	31.4351	rf III
8	200	31.3664	rf III
8	400	31.3454	rf III
8	800	31.3242	rf III
9	50	31.6159	rf III
9	100	31.4279	rf III
9	200	31.4118	rf III
9	400	31.345	rf III
9	800	31.3054	rf III
10	50	31.5235	rf III
10	100	31.4299	rf III
10	200	31.3658	rf III
10	400	31.3367	rf III
10	800	31.3218	rf III
11	50	31.5228	rf III
11	100	31.393	rf III
11	200	31.366	rf III
11	400	31.3296	rf III
11	800	31.3137	rf III
12	50	31.6054	rf III
12	100	31.4767	rf III
12	200	31.3772	rf III
12	400	31.3719	rf III
12	800	31.3073	rf III
13	50	31.5528	rf III
13	100	31.4969	rf III
13	200	31.4025	rf III
13	400	31.3415	rf III
13	800	31.3059	rf III
14	50	31.5205	rf III
14	100	31.4911	rf III
14	200	31.3673	rf III
14	400	31.3105	rf III
14	800	31.3248	rf III
15	50	31.5521	rf III
15	100	31.4908	rf III
15	200	31.373	rf III
15	400	31.3564	rf III
15	800	31.3181	rf III
